# Supplementary material
Source: PubMed Central journal article supplement (PMC5529038)
Supplement: NIHMS880400-supplement.pdf [file NIHMS880400-supplement.pdf]

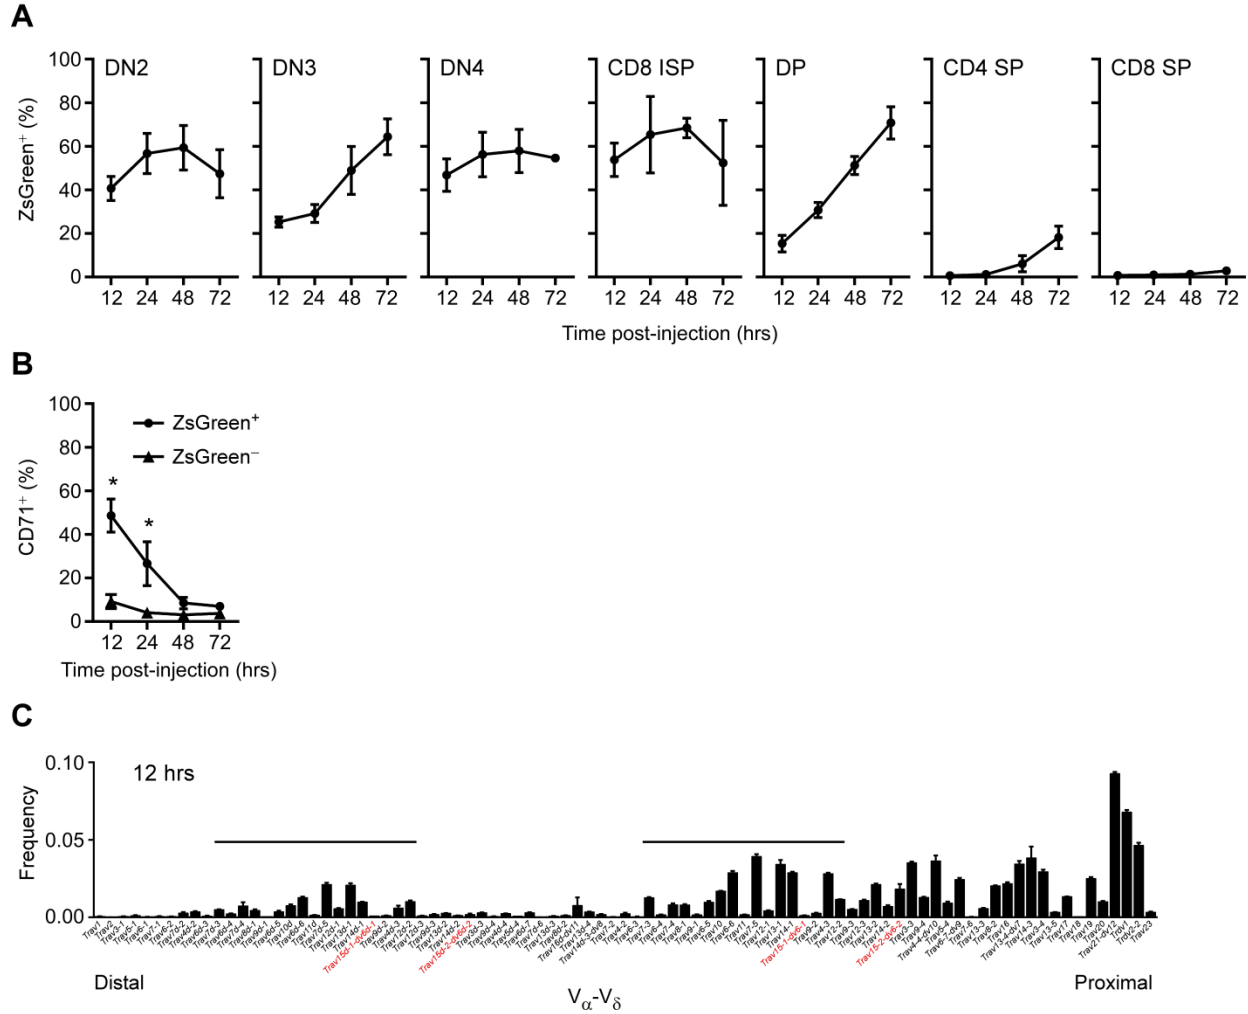

**Figure S1. Inducible ZsGreen labeling of thymocytes in *Tcrd<sup>CreER</sup> Rosa26<sup>fl-STOP-fl-ZsGreen</sup>* mice. Related to Figure 2.** (A) Percentage ZsGreen expression in given thymocyte compartments as assessed by flow cytometry. Compartments were defined as follows: DN2, Lin<sup>-</sup>CD4<sup>-</sup>CD8<sup>-</sup>CD3 $\epsilon$ <sup>-</sup>CD44<sup>+</sup>CD25<sup>+</sup>; DN3, Lin<sup>-</sup>CD4<sup>-</sup>CD8<sup>-</sup>CD3 $\epsilon$ <sup>-</sup>CD44<sup>-</sup>CD25<sup>+</sup>; DN4, Lin<sup>-</sup>CD4<sup>-</sup>CD8<sup>-</sup>CD3 $\epsilon$ <sup>-</sup>CD44<sup>-</sup>CD25<sup>-</sup>; CD8ISP, Lin<sup>-</sup>CD4<sup>-</sup>CD8<sup>+</sup>CD3 $\epsilon$ <sup>-</sup>; DP, Lin<sup>-</sup>CD4<sup>+</sup>CD8<sup>+</sup>CD3 $\epsilon$ <sup>-</sup>; CD4SP, Lin<sup>-</sup>CD4<sup>+</sup>CD8<sup>-</sup>CD3 $\epsilon$ <sup>+</sup>; CD8SP, Lin<sup>-</sup>CD4<sup>-</sup>CD8<sup>+</sup>CD3 $\epsilon$ <sup>+</sup>. Data represent the mean and s.d. of 3-7 mice per timepoint. (B) CD71 expression in ZsGreen<sup>+</sup> and ZsGreen<sup>-</sup> DP thymocyte populations as assessed by flow cytometry. CD71<sup>+</sup> and CD71<sup>-</sup> gates were determined using fluorescence-minus-one staining strategy. Data are presented as mean and s.d. of 3 mice per timepoint analyzed in two independent experiments. \**P*  $\leq$  0.0001 by repeated-measures two-way ANOVA with Sidak's multiple comparisons test. (C) V $\alpha$  segment usage in ZsGreen<sup>+</sup> DP thymocytes of *Tcrd<sup>CreER</sup> Rosa26<sup>fl-STOP-fl-ZsGreen</sup>* mice isolated 12 hrs after tamoxifen injection. Data are identical to Figure 2B, top left panel, with V $\alpha$  and V $\delta$  segments identified and *Trav15d-dv6* family members highlighted in red. Lines in the V $\alpha$ -V $\delta$  plot identify homologous sets of central and central duplication V segments targeted for early rearrangement.

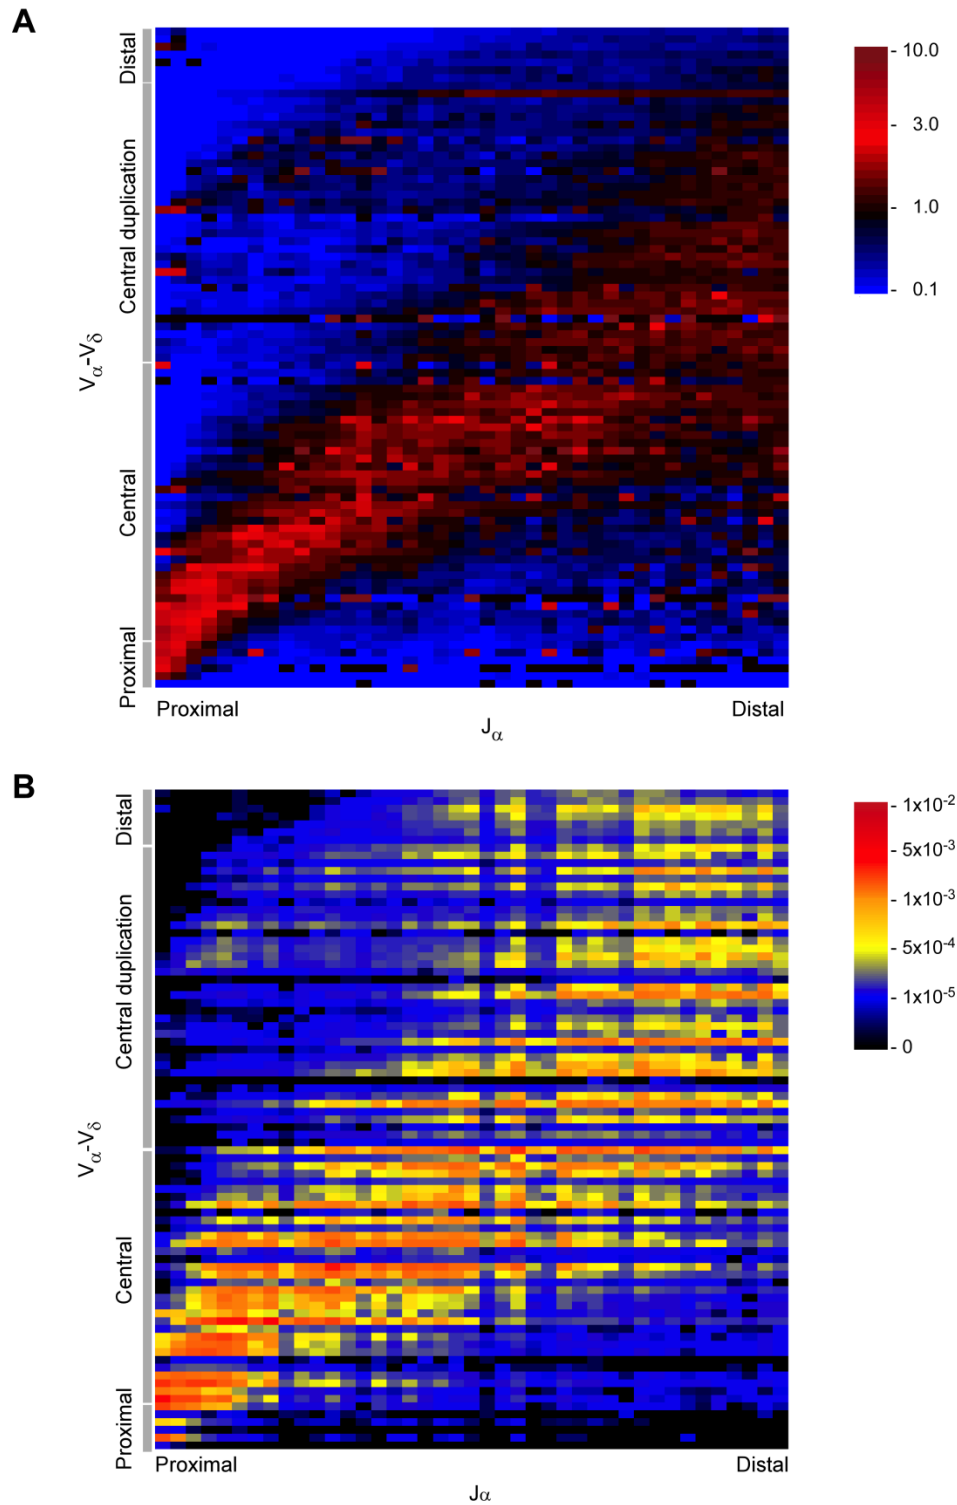

**Figure S2. HY $\alpha$  *Tcr* $\alpha$  repertoire in thymus and periphery. Related to Figure 3.** (A) Difference map depicting ratio of average  $V_{\alpha}$ - $J_{\alpha}$  rearrangement frequencies in HY $\alpha$  DP thymocytes to those in wild-type, using data in Figures 1B and 3B. Ratios greater than or equal to ten are binned into the same color. (B)  $V_{\alpha}$ - $J_{\alpha}$  rearrangement frequencies in HY $\alpha$  CD3<sup>+</sup>CD8<sup>+</sup>CD44<sup>-</sup>CD62L<sup>+</sup> splenocytes as determined by HTS of *Tcr* $\alpha$  transcripts amplified using 5' RACE. Data are presented as the mean of two mice analyzed in one experiment.

**A**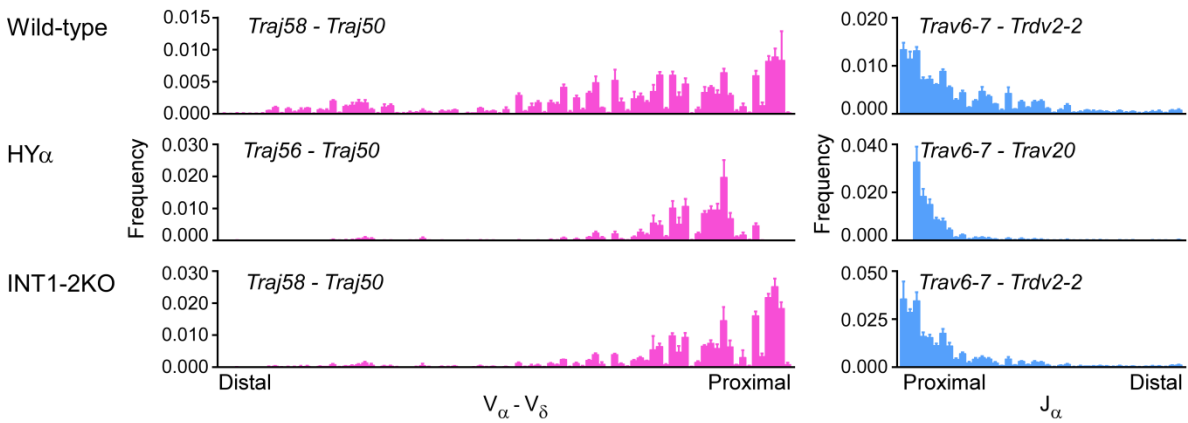**B**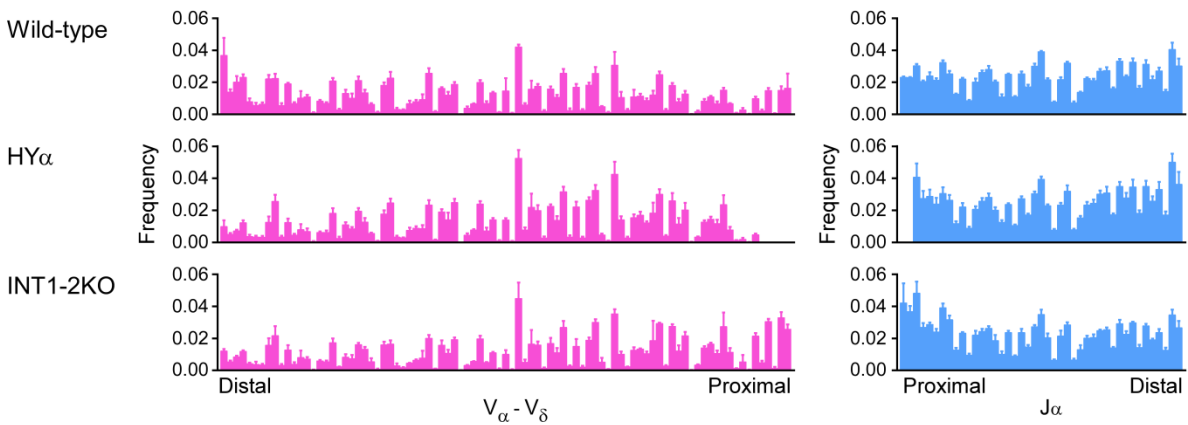

**Figure S3. Comparison of V<sub>α</sub>-J<sub>α</sub> rearrangements in wild-type, HY<sub>α</sub>, and INT1-2-deficient thymocytes. Related to Figure 5.** (A) Comparison of V<sub>α</sub> usage with relatively proximal J<sub>α</sub> segments (left), or of J<sub>α</sub> segments used with relatively proximal V<sub>α</sub> segments (right), in wild-type, HY<sub>α</sub>, and INT1-2-deficient DP thymocytes. Data are from Figures 1C, 3C, and 5C. (B) Comparison of total V<sub>α</sub> usage (left) and total J<sub>α</sub> usage (right) in wild-type, HY<sub>α</sub>, and INT1-2-deficient thymocytes. Data are from Figures 1B, 3B, and 5B and are presented as mean and s.d. of 3-4 mice for each genotype, analyzed in two independent experiments.

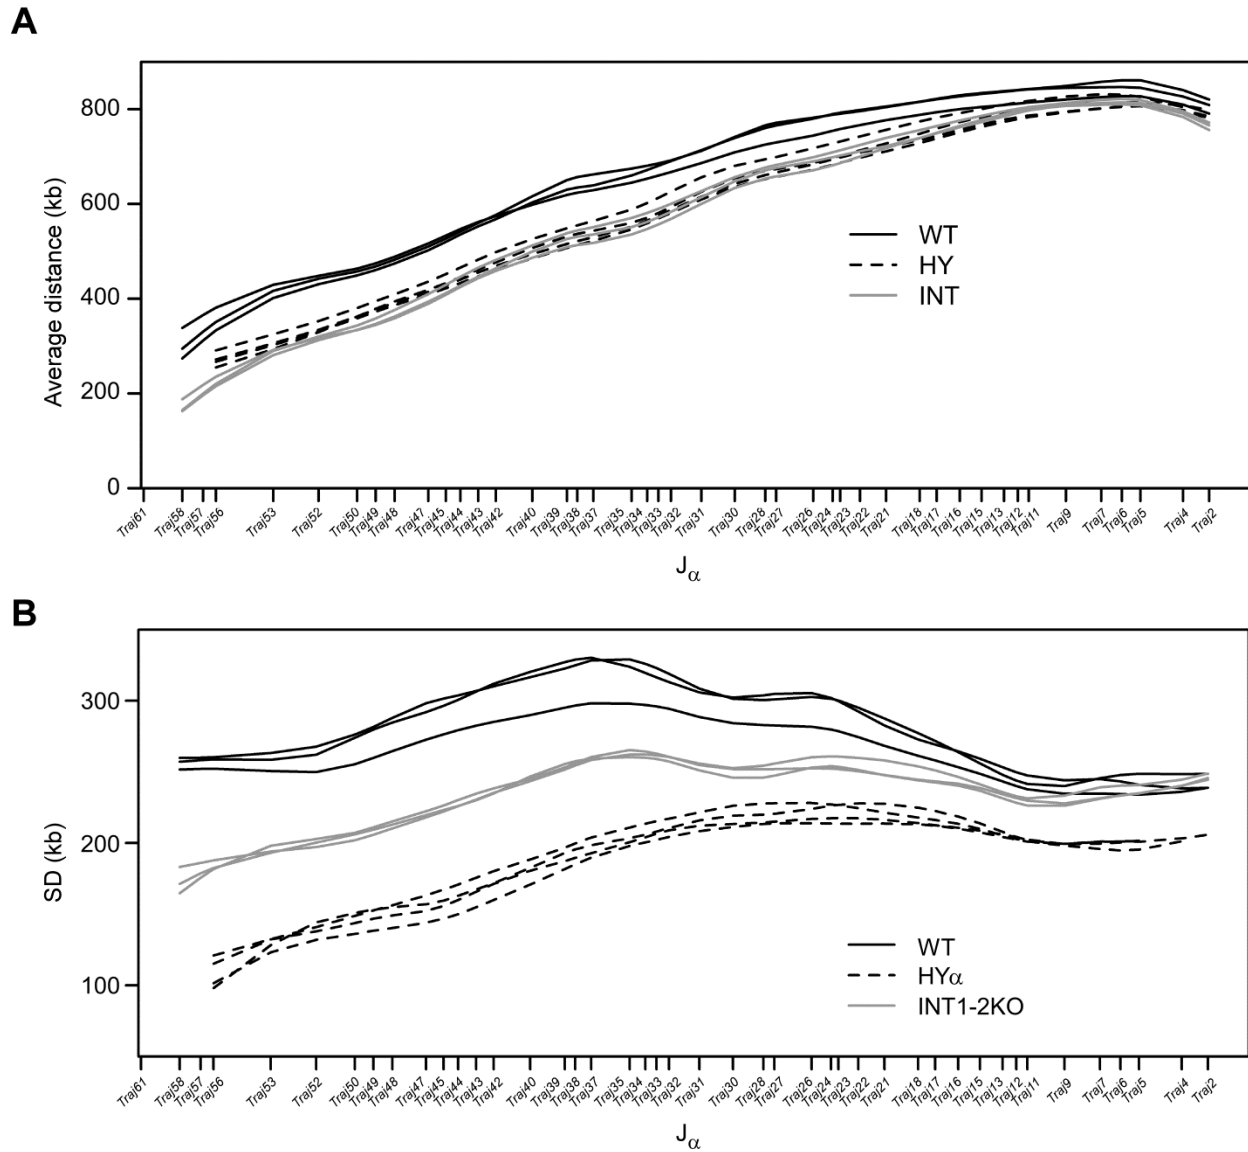

**Figure S4. Quantitative analysis of  $V_{\alpha}$ - $J_{\alpha}$  rearrangements in wild-type,  $HY_{\alpha}$ , and INT1-2-deficient thymocytes. Related to Figure 5.** (A) Frequency-weighted means of the chromosomal coordinates of the  $V_{\alpha}$  segments used with each  $J_{\alpha}$  segment, with  $V_{\alpha}$  chromosomal coordinates expressed as distance (in kb) from *Traj58*, and  $J_{\alpha}$  segments plotted according to their chromosomal coordinates. (B) Frequency-weighted standard deviations of  $V_{\alpha}$  segment usage (in kb) were plotted as a function of  $J_{\alpha}$  segment. Each line was generated by fitting a smoothed spline function to the data from a single mouse. Statistical tests are presented in Table S2.

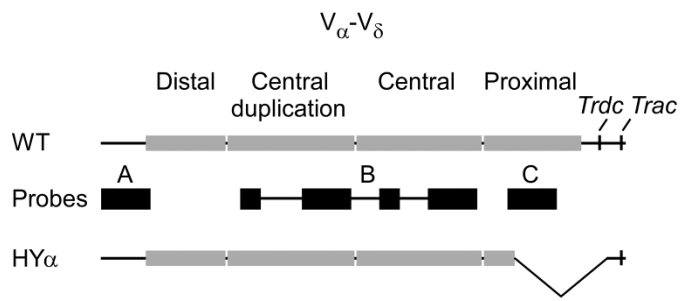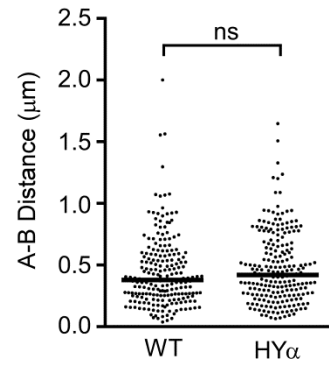

**Figure S5. Extended  $V_{\alpha}-V_{\delta}$  conformation on wild-type and HY $\alpha$  *Tera* alleles. Related to Figure 6. (A)** Schematic of hybridization of DNA-FISH probes A, B, and C to wild-type and HY $\alpha$  *Tera* alleles. (B) Distance between centers of probe A and B hybridization on individual alleles in DP thymocytes generated from *Rag2*<sup>-/-</sup> heterozygous for the HY $\alpha$  allele. The horizontal line denotes median distance. Measurements were compiled from 216 nuclei examined from slides prepared from three mice analyzed in two independent experiments. ns, not significant ( $P=0.16$ ) by Mann-Whitney U test.

**Table S1. Quality of repertoire analyses. Related to Figure 1.**

| Sample                    | No. of sequences passing MiXCR QC |           |           |         | No. of unique clones |         |         |         |
|---------------------------|-----------------------------------|-----------|-----------|---------|----------------------|---------|---------|---------|
|                           | Rep. 1                            | Rep. 2    | Rep. 3    | Rep.4   | Rep. 1               | Rep. 2  | Rep. 3  | Rep.4   |
| wild-type DP              | 618,929                           | 605,294   | 959,253   | -       | 67,098               | 118,262 | 140,982 | -       |
| HY $\alpha$ DP            | 219,828                           | 730,265   | 1,623,523 | 969,911 | 62,124               | 92,711  | 182,959 | 118,118 |
| INT1-2-KO DP              | 885,547                           | 558,082   | 960,521   | -       | 107,483              | 83,785  | 125,284 | -       |
| HY $\alpha$ spleen        | 1,335,088                         | 1,686,050 | -         | -       | 139,923              | 111,370 | -       | -       |
| ZsGreen <sup>+</sup> 12hr | 958,297                           | 1,115,107 | -         | -       | 25,758               | 31,480  | -       | -       |
| 24hr                      | 623,464                           | 1,068,044 | -         | -       | 86,477               | 11,549  | -       | -       |
| 48hr                      | 923,259                           | 1,270,032 | -         | -       | 146,222              | 34,606  | -       | -       |
| 72hr                      | 1,264,011                         | 877053    | -         | -       | 187,444              | 14,753  | -       | -       |
| ZsGreen <sup>-</sup> 12hr | 499,955                           | -         | -         | -       | 11,992               | -       | -       | -       |
| 24hr                      | 733,689                           | -         | -         | -       | 14,409               | -       | -       | -       |
| 48hr                      | 946,922                           | 1,042,691 | -         | -       | 134,768              | 134,811 | -       | -       |

**Table S2. V<sub>α</sub> usage in different genotypes. Related to Figure 4.**

| Genotype  | Average V <sub>α</sub> position              |                                |                             |                                | V <sub>α</sub> position variance  |                                |                             |                                |
|-----------|----------------------------------------------|--------------------------------|-----------------------------|--------------------------------|-----------------------------------|--------------------------------|-----------------------------|--------------------------------|
|           | Initial V <sub>α</sub><br>(SEM) <sup>1</sup> | p-value<br>vs. WT <sup>2</sup> | Slope<br>(SEM) <sup>3</sup> | p-value<br>vs. WT <sup>2</sup> | Initial SD<br>(SEM) <sup>1</sup>  | p-value<br>vs. WT <sup>2</sup> | Slope<br>(SEM) <sup>3</sup> | p-value<br>vs. WT <sup>2</sup> |
| Wild-type | 331,660<br>(1.56x10 <sup>4</sup> )           | –                              | 14.41<br>(0.89)             | –                              | 240,876<br>(6.6x10 <sup>3</sup> ) | –                              | 3.66<br>(0.25)              | –                              |
| HYα       | 259,777<br>(2.06x10 <sup>4</sup> )           | 0.01                           | 12.76<br>(1.18)             | 0.165                          | 107,898<br>(8.7x10 <sup>3</sup> ) | <0.001                         | 3.89<br>(0.33)              | 0.478                          |
| INT1-2KO  | 208,042<br>(2.20x10 <sup>4</sup> )           | 0.001                          | 15.29<br>(1.26)             | 0.488                          | 168,685<br>(9.3x10 <sup>3</sup> ) | <0.001                         | 4.11<br>(0.35)              | 0.2                            |

<sup>1</sup>Distance in base pairs (bp) from the most V<sub>α</sub>-proximal J<sub>α</sub> segment.

<sup>2</sup>As determined by two-factor ANOVA.

<sup>3</sup>Expressed as V<sub>α</sub> bp/J<sub>α</sub> bp, determined between *Traj52* and *Traj37*
